# Supplementary material for: Roux-En-Y Gastric Bypass (RYGB) Surgery during High Liquid Sucrose Diet Leads to Gut Microbiota-Related Systematic Alterations
Source: MDPI journal article supplement (doi:10.3390/ijms23031126), 2022-01-20
Supplement: s1 [file s1]

## Supplementary Material

1. Supplementary figures S1 – S8
2. Supplementary tables ST1 – ST3

## Roux-en-Y Gastric Bypass (RYGB) Surgery During High Liquid Sucrose Diet Leads to Gut Microbiota-Related Systematic Alterations

Laimdota Zizmare<sup>1</sup>, Christina N. Boyle<sup>2</sup>, Sabrina Buss<sup>1</sup>, Sandrine Louis<sup>3</sup>, Laura Kuebler<sup>1</sup>, Ketki Mulay<sup>4</sup>, Ralf Krüger<sup>3</sup>, Lara Steinhauer<sup>3</sup>, Isabelle Mack<sup>5</sup>, Manuel Rodriguez Gomez<sup>3</sup>, Kristina Herfert<sup>1</sup>, Yvonne Ritze<sup>4,\*</sup>, Christoph Trautwein<sup>1</sup>

<sup>1</sup>Werner Siemens Imaging Center, Department of Preclinical Imaging and Radiopharmacy, Eberhard Karls University of Tübingen, University Hospital Tübingen, Röntgenweg 13, 72076, Tübingen, Germany;

<sup>2</sup>Institute of Veterinary Physiology, University of Zurich, Winterthurerstraße 260, CH-8057, Zurich, Switzerland;

<sup>3</sup>Department of Physiology and Biochemistry of Nutrition, Max Rubner-Institut, Haid-und-Neu-Straße 9, 76131, Karlsruhe, Germany;

<sup>4</sup>Department of Medical Psychology and Behavioral Neurobiology, Eberhard Karls University of Tübingen, Silcherstraße 5, 72076, Tübingen, Germany;

<sup>5</sup>Department of Psychosomatic Medicine and Psychotherapy, University Hospital Tübingen, Osianderstraße 5, 72076, Tübingen, Germany.

\*Corresponding author: Yvonne Ritze, [contact@yvonne-ritze.com](mailto:contact@yvonne-ritze.com)

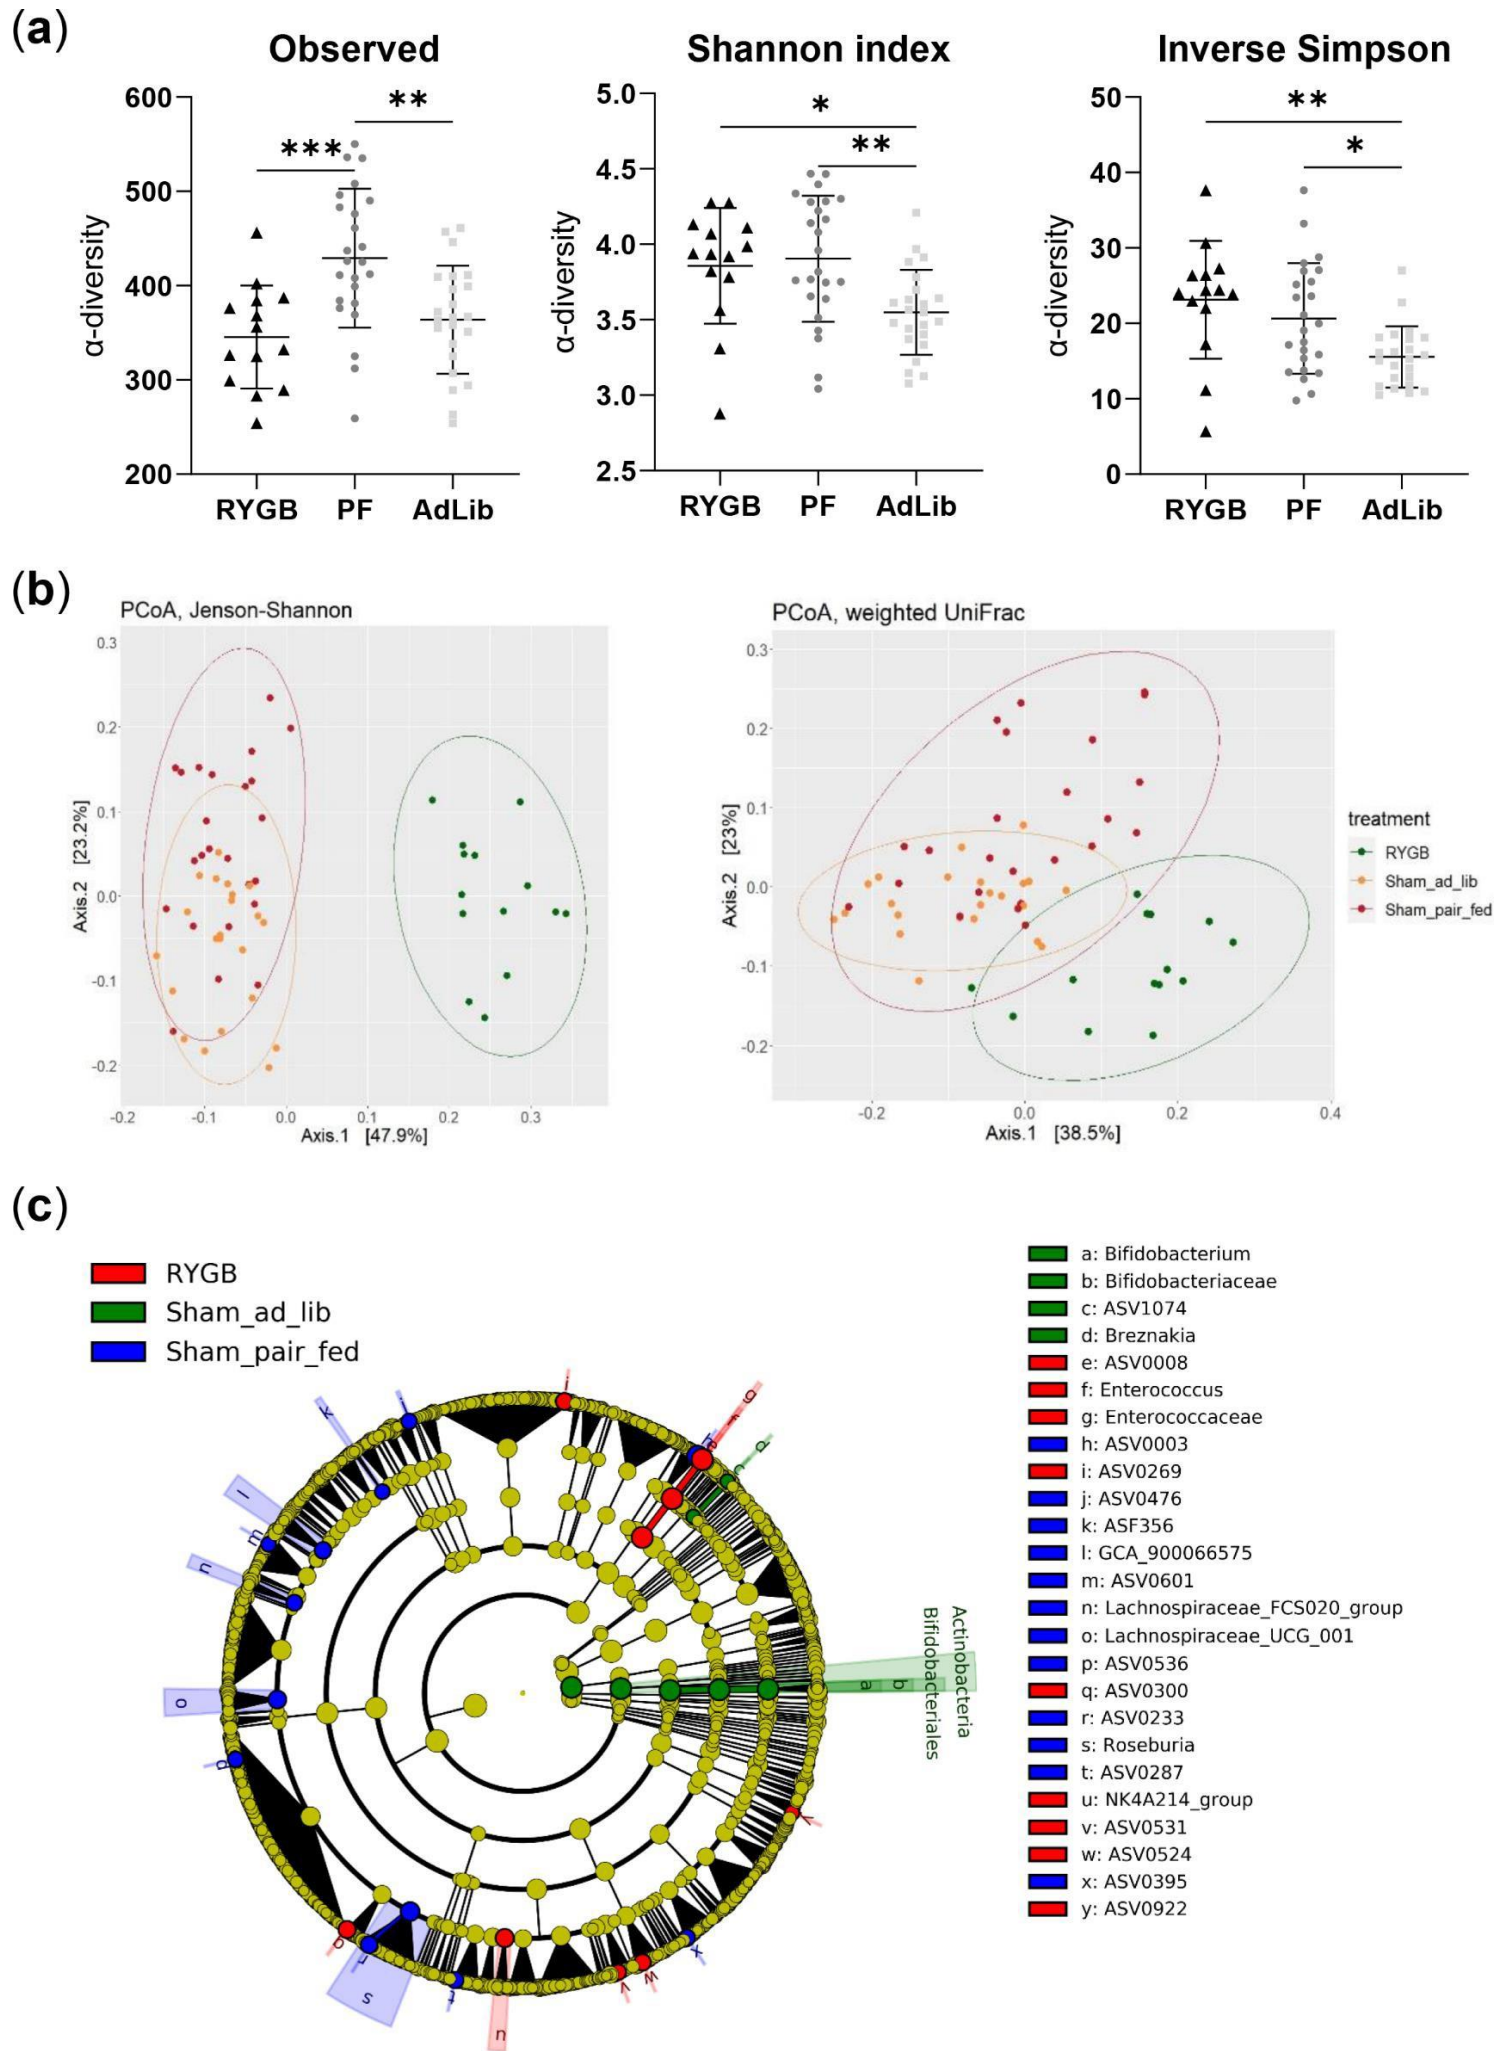

**Supplementary Figure S1: Microbiota analysis.** (a)  $\alpha$ -diversity, the microbial community in AdLib animals was less diverse than in the other groups (diversity as the observed number of species, Shannon index and inverse Simpson). (b)  $\beta$ -diversity, principal coordinate analysis (PCoA) illustrating the separation of RYGB samples from the 2 other groups and showing the changes in the microbiota composition after surgery (PCoA based on either the Jenson-Shannon distance or the weighted UniFrac distance; each dot represents the whole gut microbiota from each animal at feces collection time). (c) LefSe analysis indicates the significant marker of each group represented in a phylogenetic cladogram. Pooled data was used from feces collection at four and eight weeks post-surgery, and at the day of euthanasia;  $p$ -values: \*\*\*  $< 0.001$ , \*\*  $< 0.01$ , \*  $< 0.05$ .

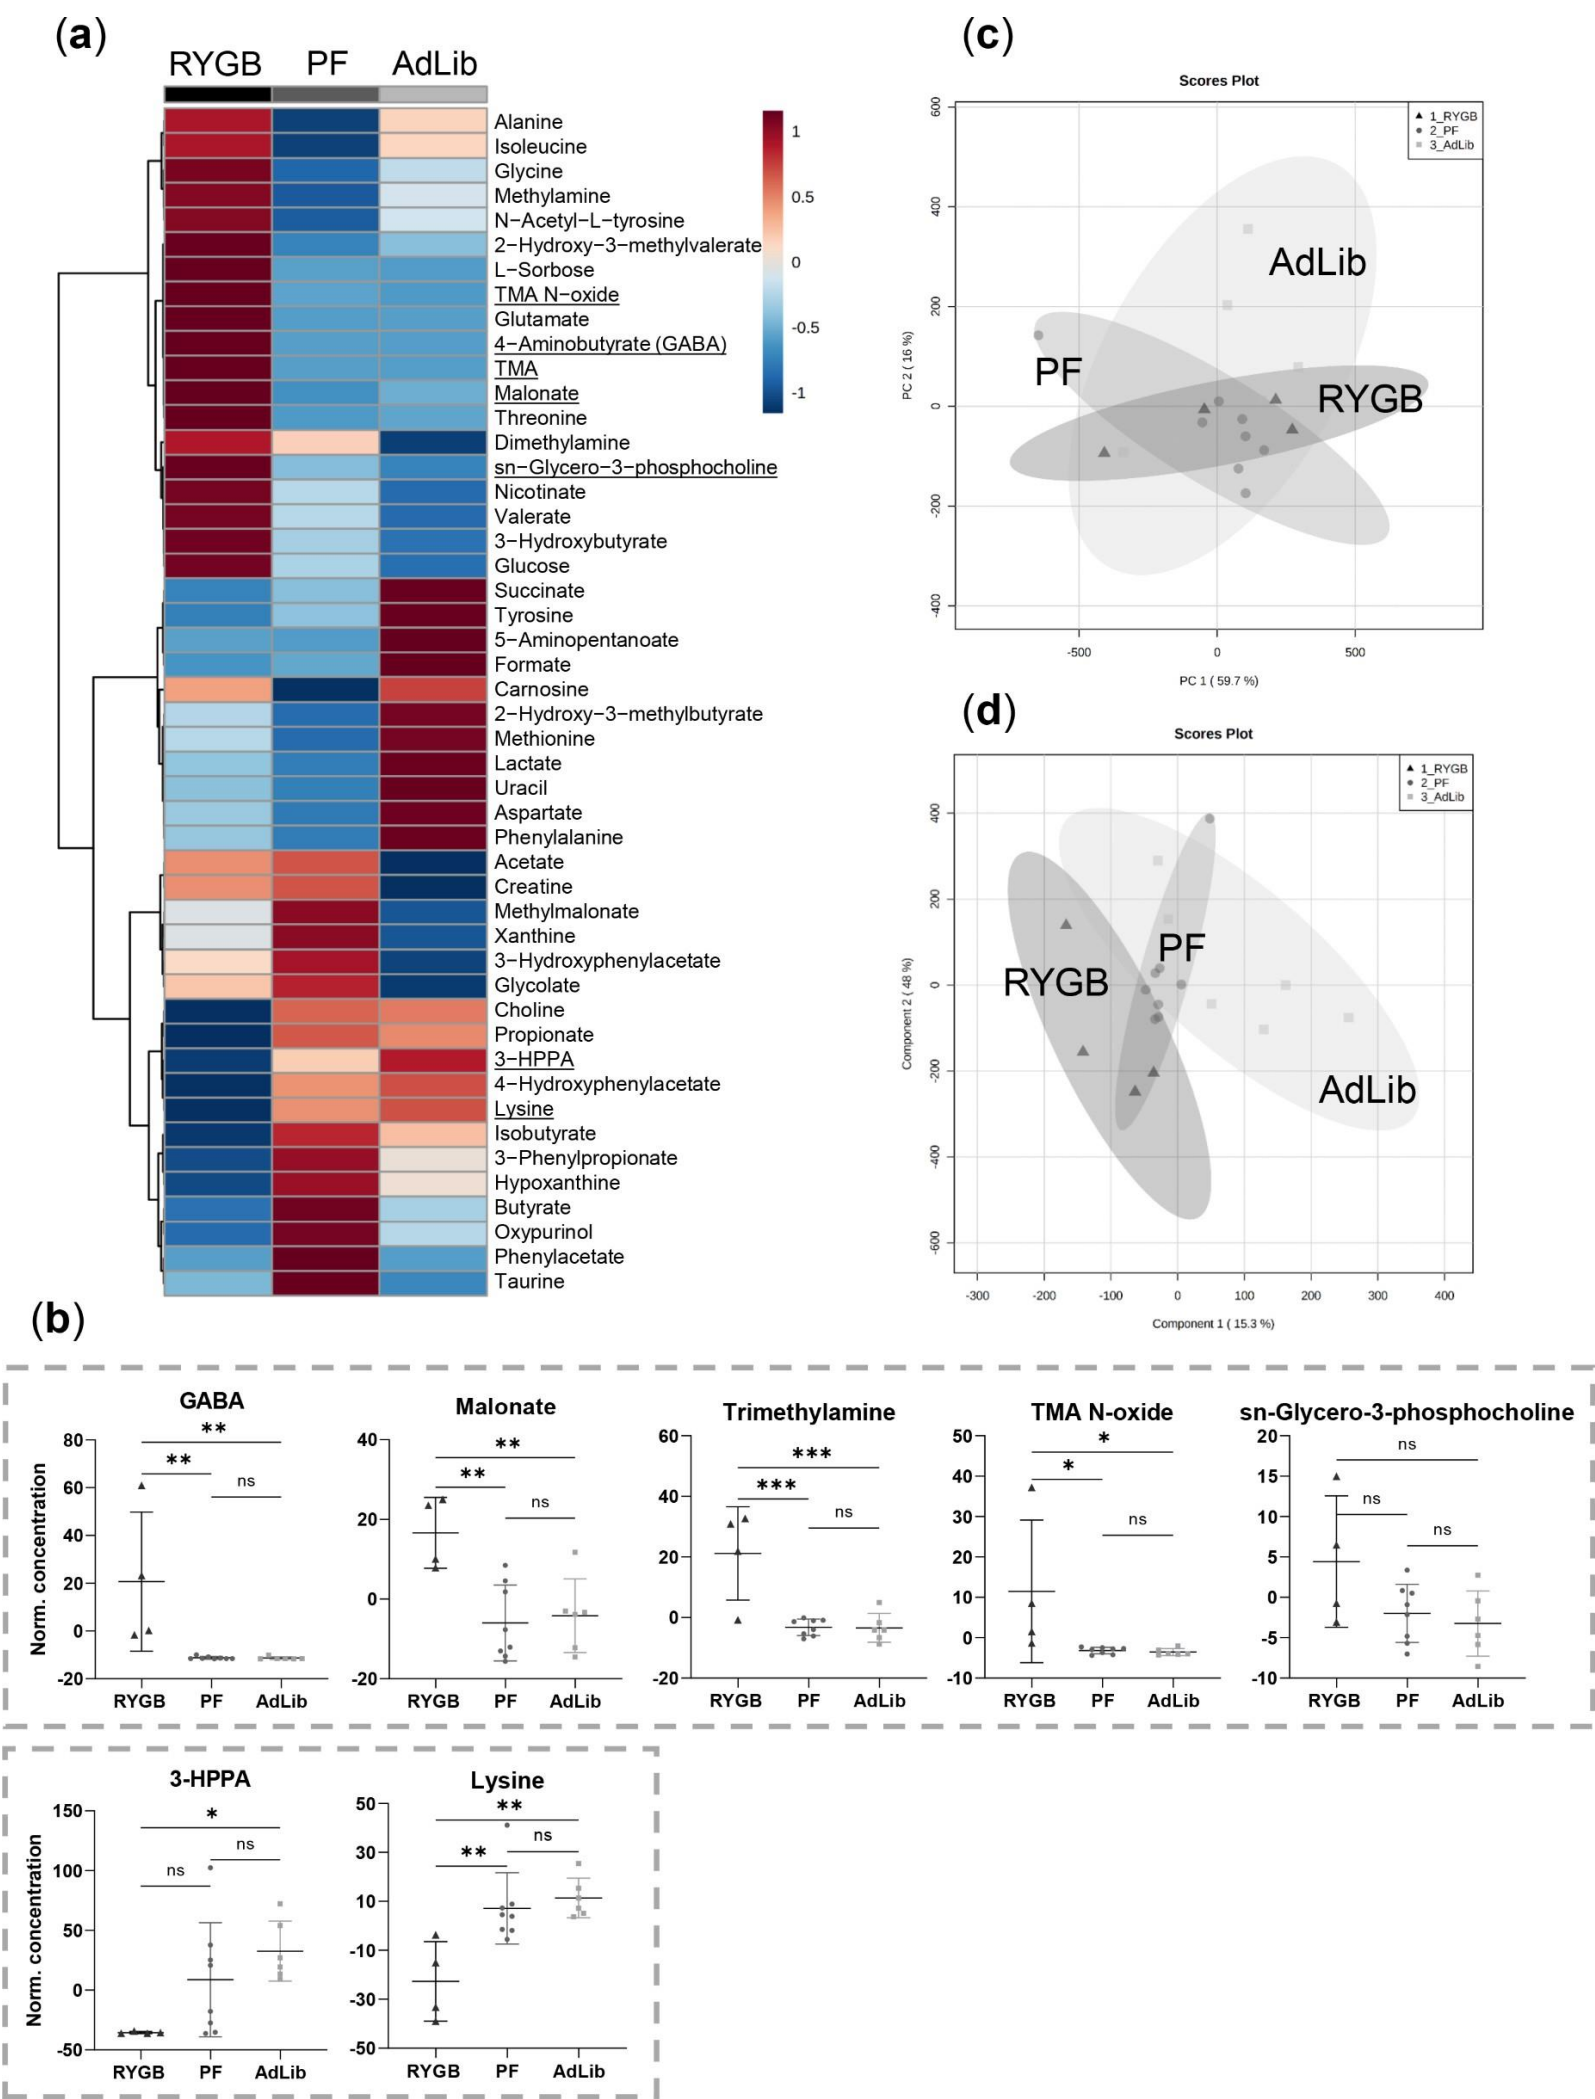

**Supplementary Figure S2: Feces metabolomics four weeks after RYGB/sham surgery.** (a) Averaged heat map illustrating all the quantified feces metabolites with their relative concentration increase (red) or decrease (blue). (b) Individual metabolite box plots. Decreased 3-hydroxyphenylpropionate (3-HPPA) and lysine in RYGB. Increased 4-aminobutyrate (GABA), malonate, trimethylamine (TMA) and TMA N-oxide in RYGB. Statistical significance based on one-way ANOVA with illustrated individual animal data points. (c) Principal component analysis (PCA) of feces samples 4 weeks after surgery. (d) Partial least squares discriminant analysis (PLSDA) regression model illustrating the further group cluster separation. 95% confidence regions are illustrated as clouds around the individual data points. RYGB (n = 4) (one animal excluded due to technical limitation of poor spectra resolution) black triangles, PF (n = 8) dark grey circles, AdLib (n = 6) light grey squares, *p*-values: \*\*\* < 0.001, \*\* < 0.01, \* < 0.05.

Supplementary Figure S3

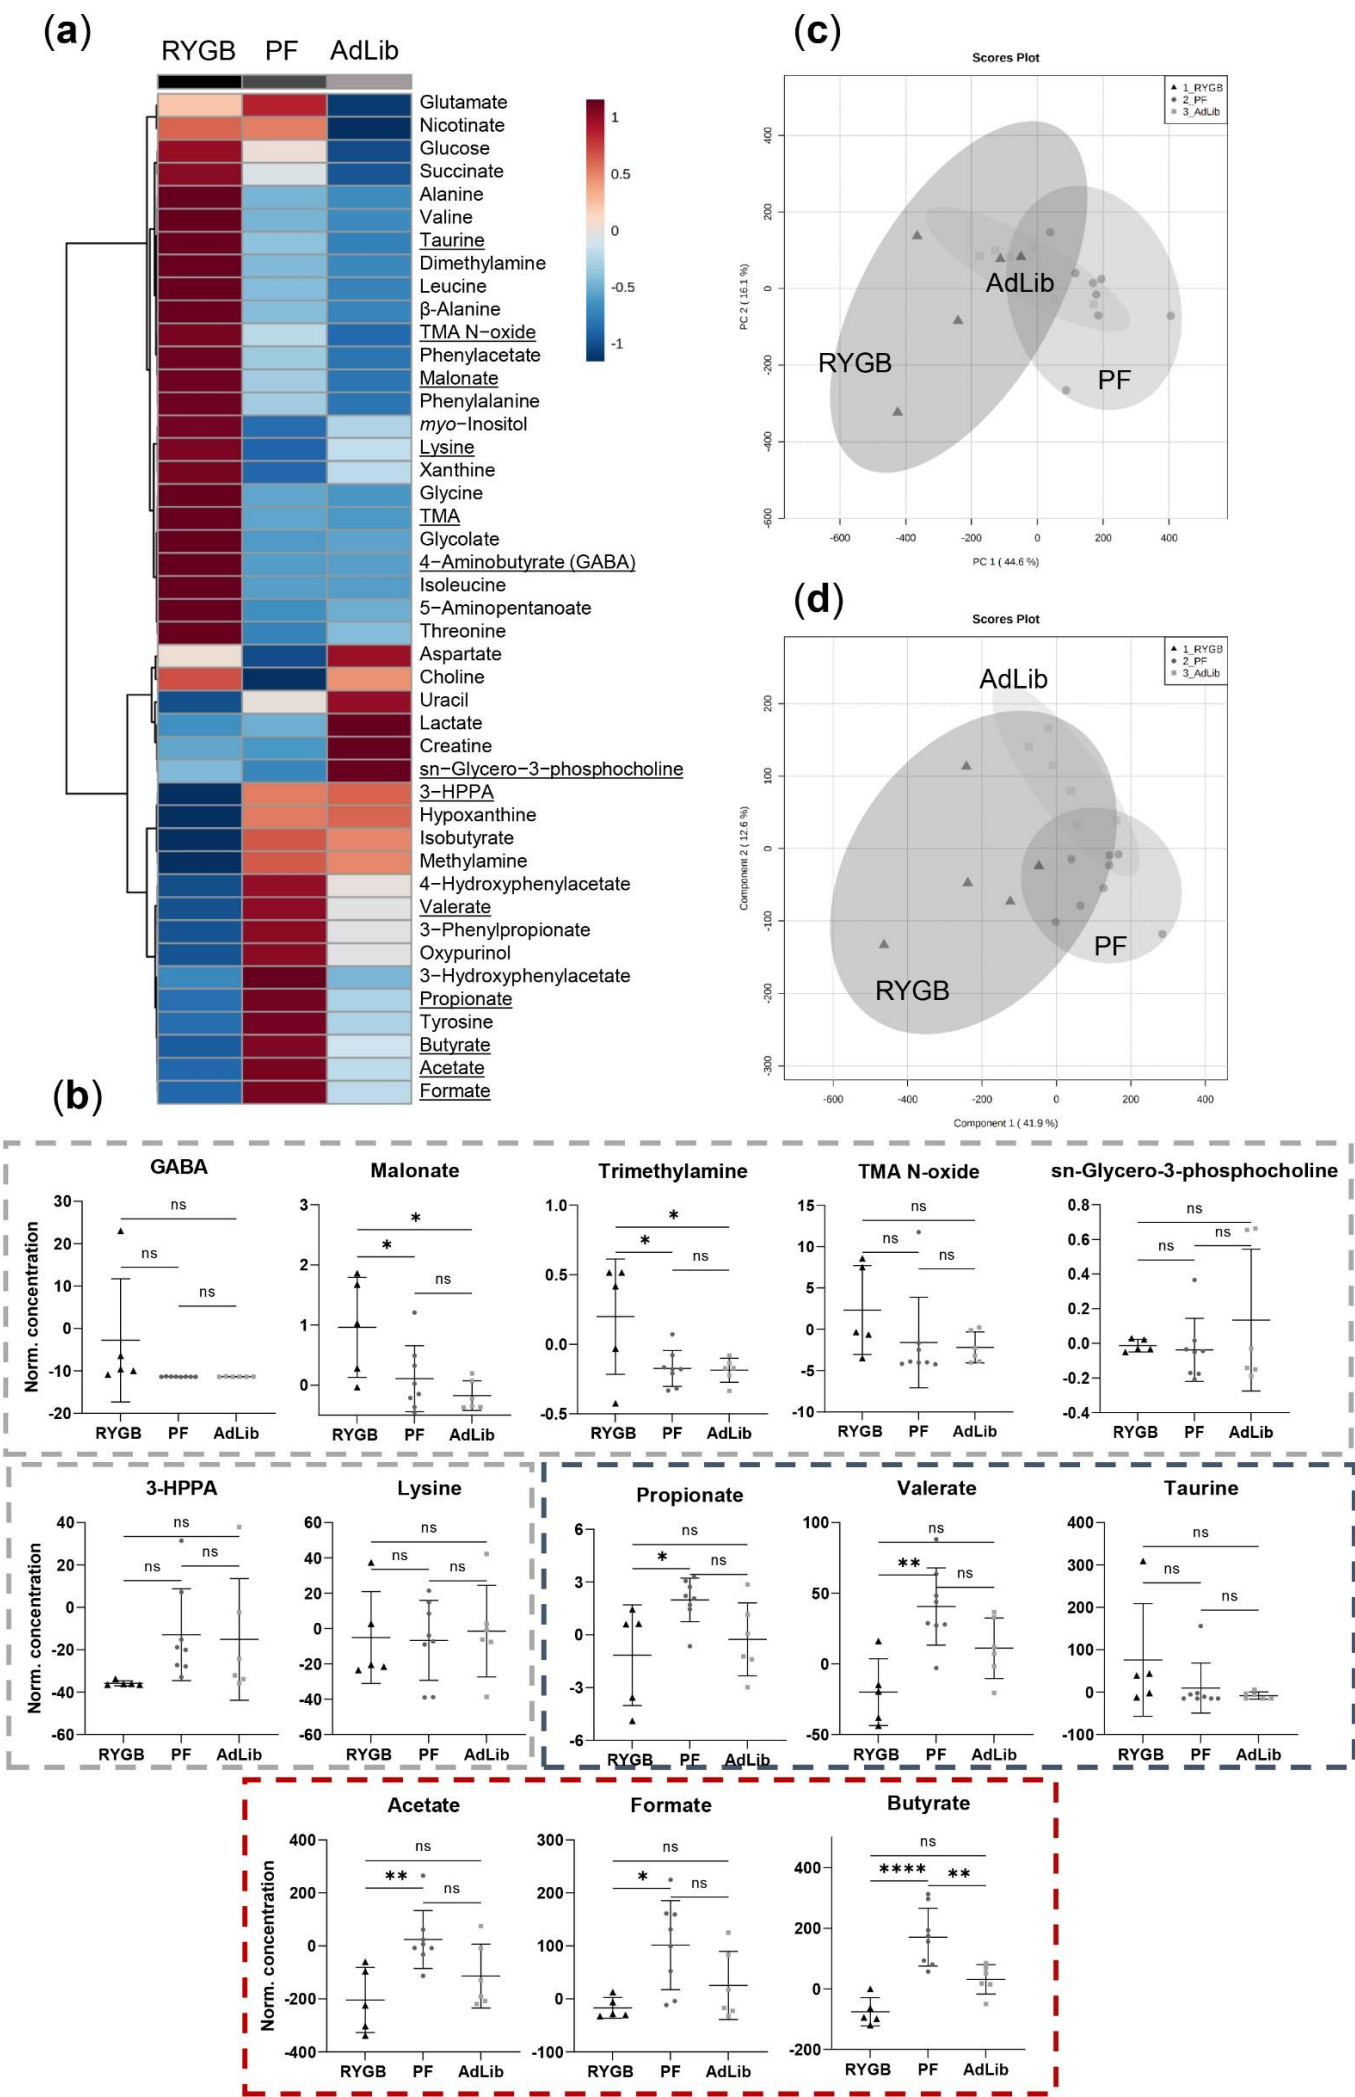

**Supplementary Figure S3: Metabolite analysis of feces collected on the day of euthanasia from the colon after RYGB/sham surgery.** (a) Averaged heat map illustrating all the quantified feces metabolites with their relative concentration increase (red) or decrease (blue). (b) Individual metabolite box plots. Grey box – feces metabolite patterns since week 4. Blue box – feces metabolite changes introduced at week 8. Red box – novel metabolite changes in feces collected on the day of euthanasia: decreased acetate, formate and butyrate in RYGB. Statistical significance based on one-way ANOVA with illustrated individual animal metabolite concentration as points. (c) Principal component analysis (PCA) of feces samples 4 weeks after surgery. (d) Partial least squares discriminant analysis (PLSDA) regression model illustrating the further group cluster separation with the RYGB sample sparsity. 95% confidence regions are illustrated as clouds around the individual data points. RYGB (n = 5) black triangles, PF (n = 8) dark grey dots, AdLib (n = 6) light grey squares, *p*-values: \*\*\*\* < 0.0001, \*\* < 0.01, \* < 0.05.



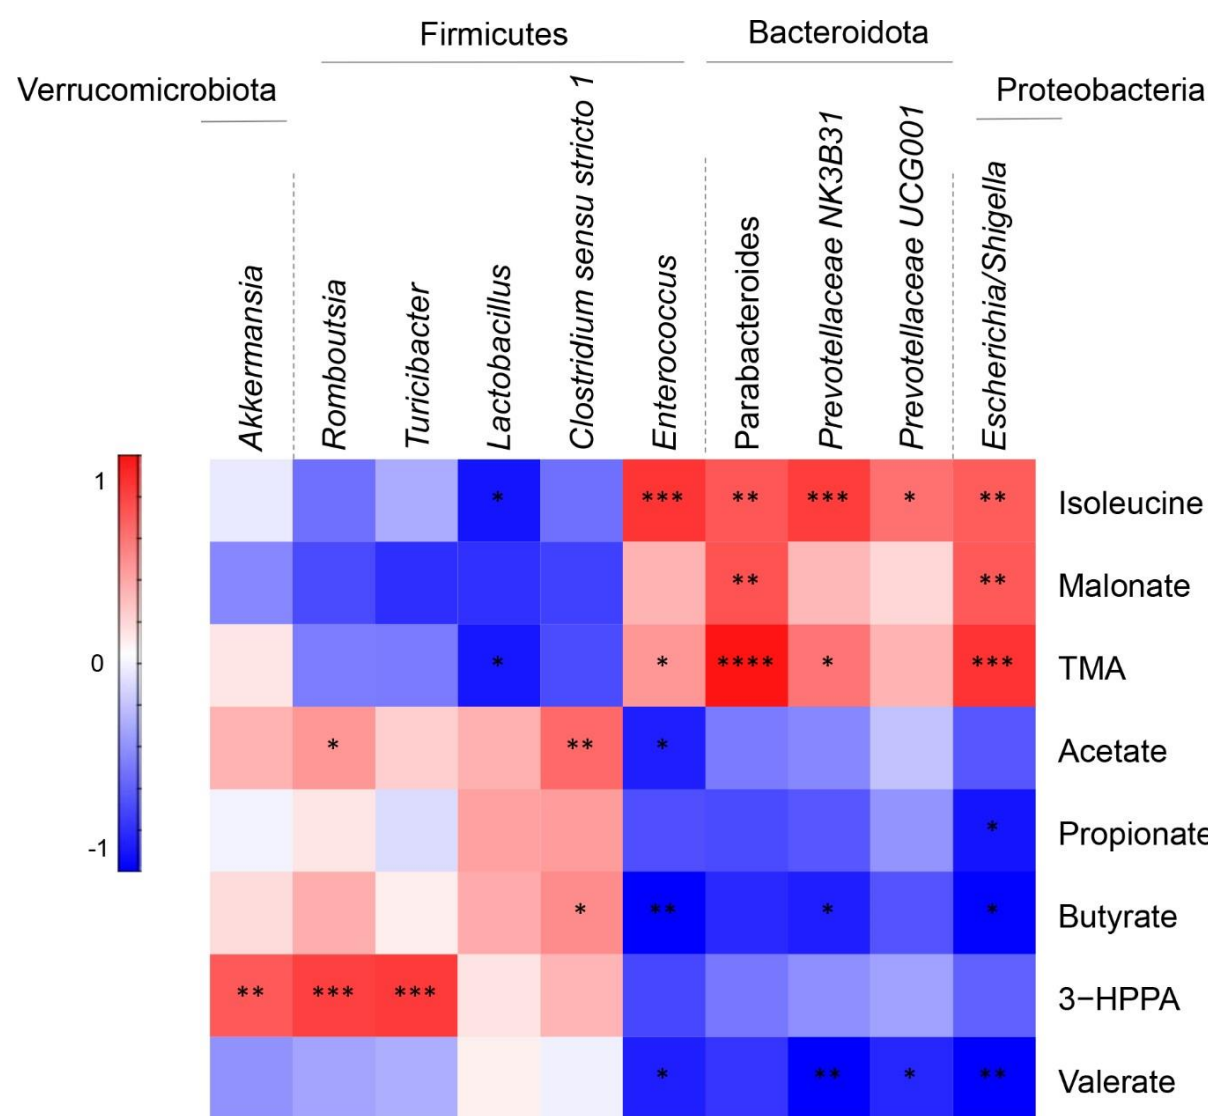

**Supplementary Figure S4: Feces microbiota and metabolomics correlation analysis.** Feces were collected directly from the colon on the day of euthanasia. 3-HPPA positively correlated with the relative abundance of *Turicibacter* and *Romboutsia*. TMA positively correlated with the relative abundance of *Escherichia/Shigella* and *Parabacteroides*. Isoleucine positively correlated with the relative abundance of *Prevotellaceae NK3B31* and *Enterococcus*. Color scheme illustrates the correlation values scaled between -1 and 1. Red color indicates a positive correlation, blue – negative correlation. Statistical significance of these correlations illustrated as *p*-values: \*\*\*\* < 0.0001, \*\*\* < 0.001, \*\* < 0.01, \* < 0.05. Correlation analysis involves all three group (RYGB, PF and AdLib) feature values using Pearson r distance measure for the correlation coefficient determination.

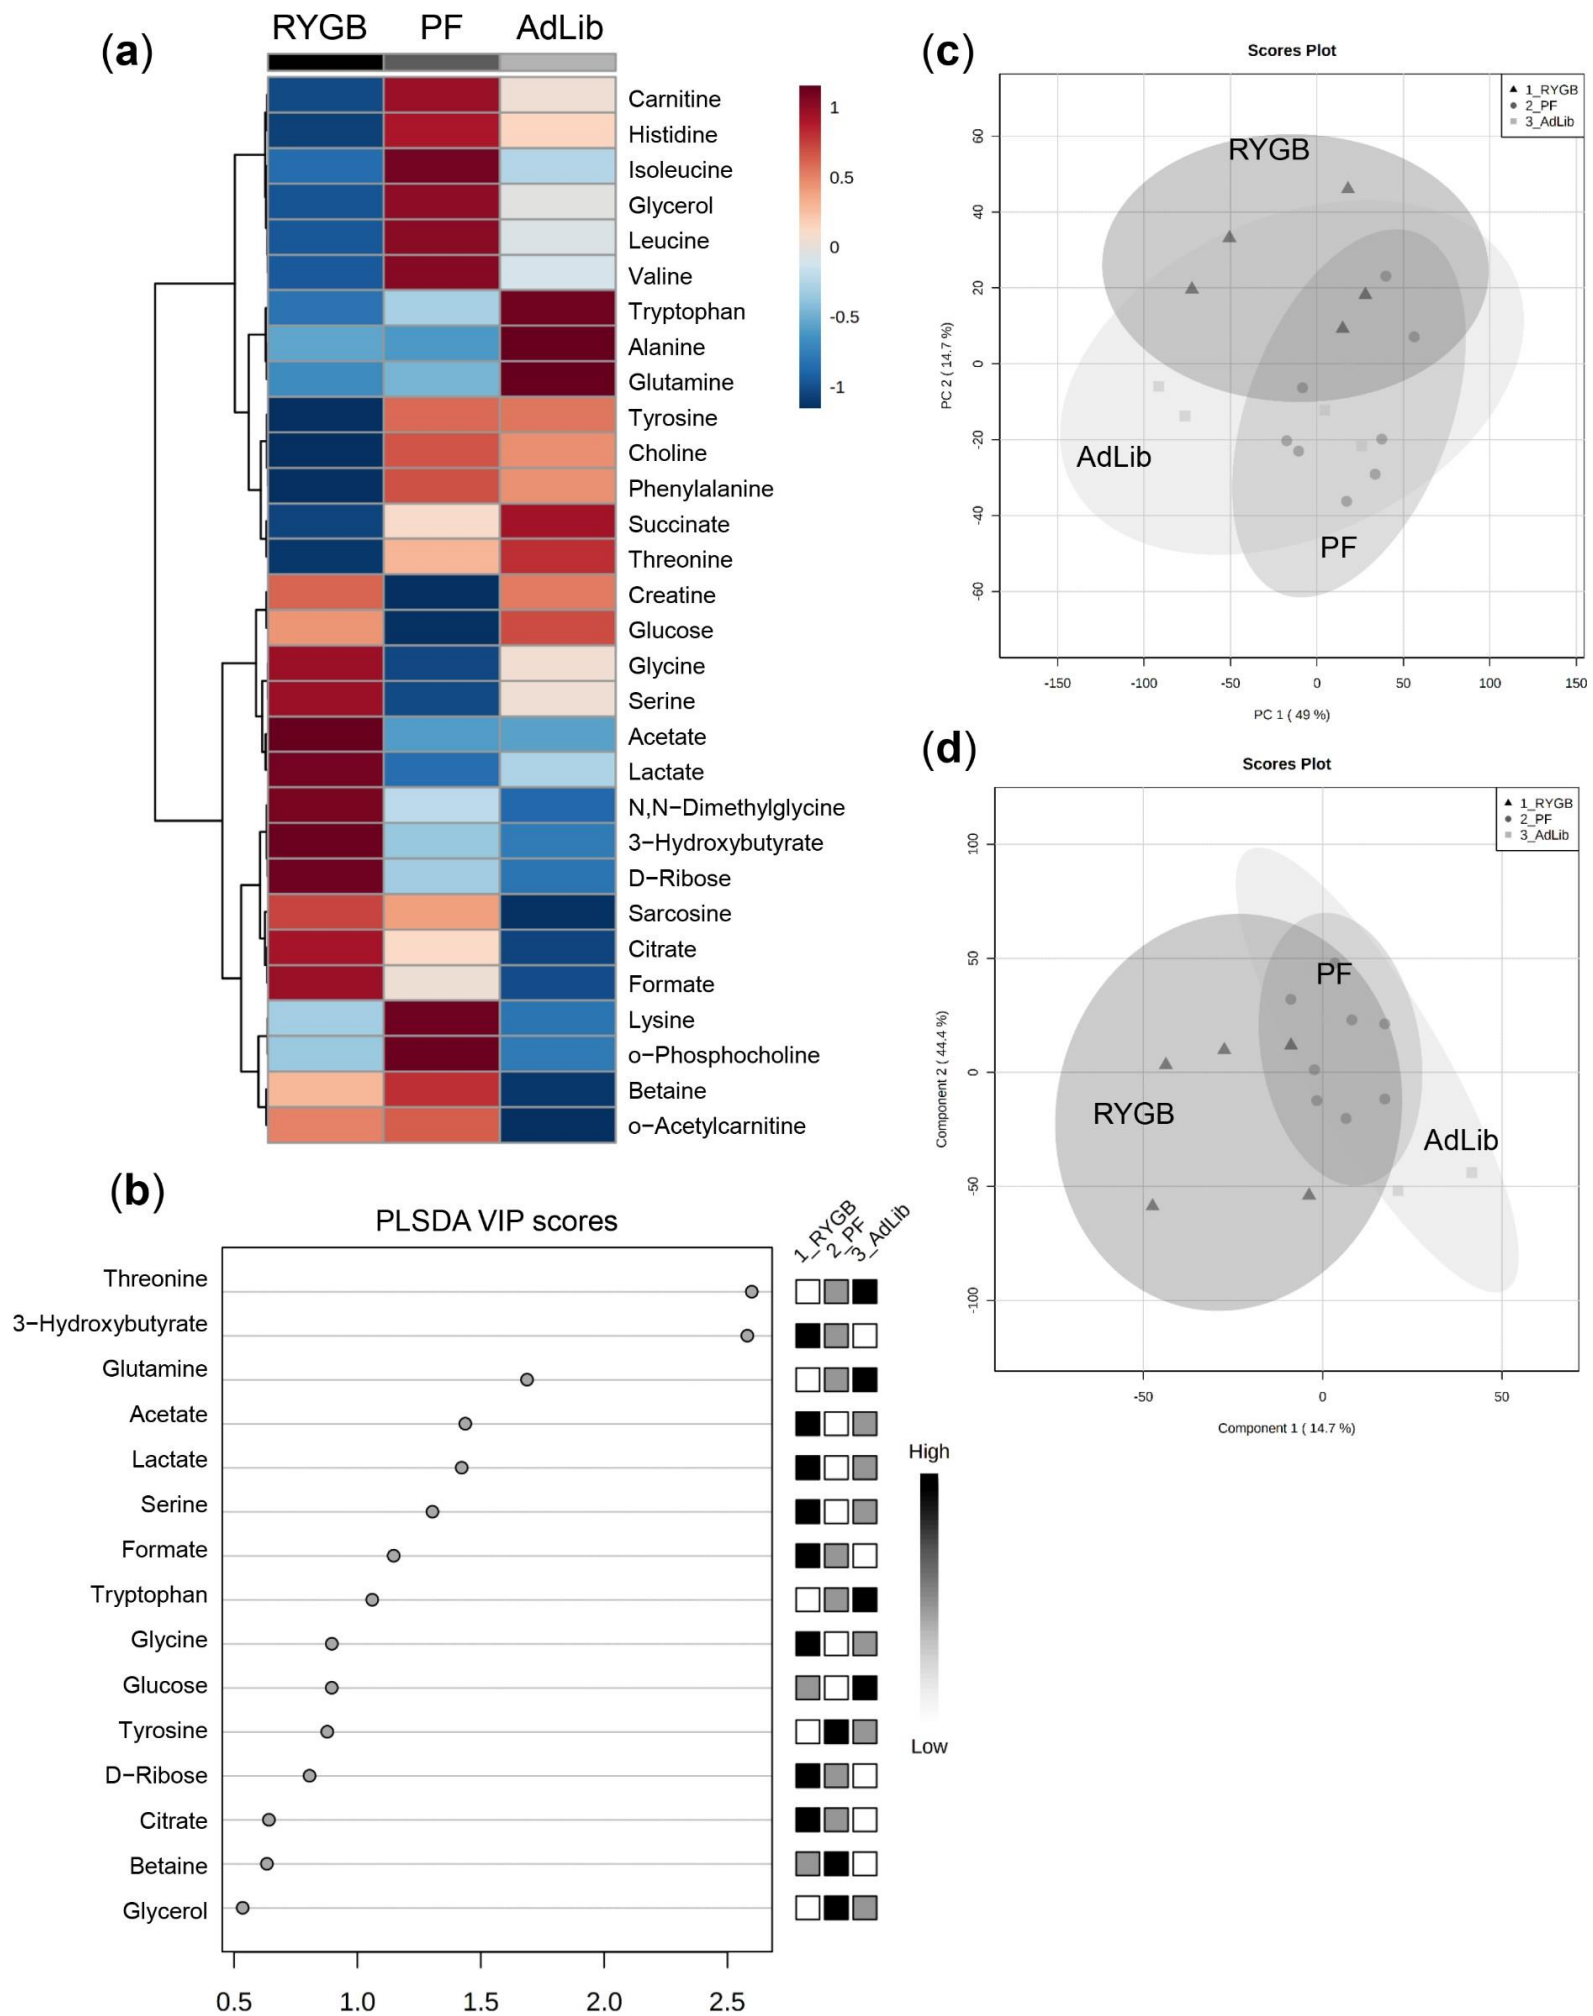

**Supplementary Figure S5: Plasma metabolomics.** (a) Averaged group metabolite concentration heat map illustrating all the quantified plasma metabolites with their relative concentration increase (red) or decrease (blue). (b) Partial least squares discriminant analysis (PLSDA) variable importance in projection (VIP) scores visualisation of most changing metabolites between the groups. (c) Principal component analysis (PCA) of plasma samples. (d) PLSDA regression model illustrating the further group cluster separation. 95% confidence regions are illustrated as clouds around the individual data points. RYGB (n = 5), PF (n = 8), AdLib (n = 6).



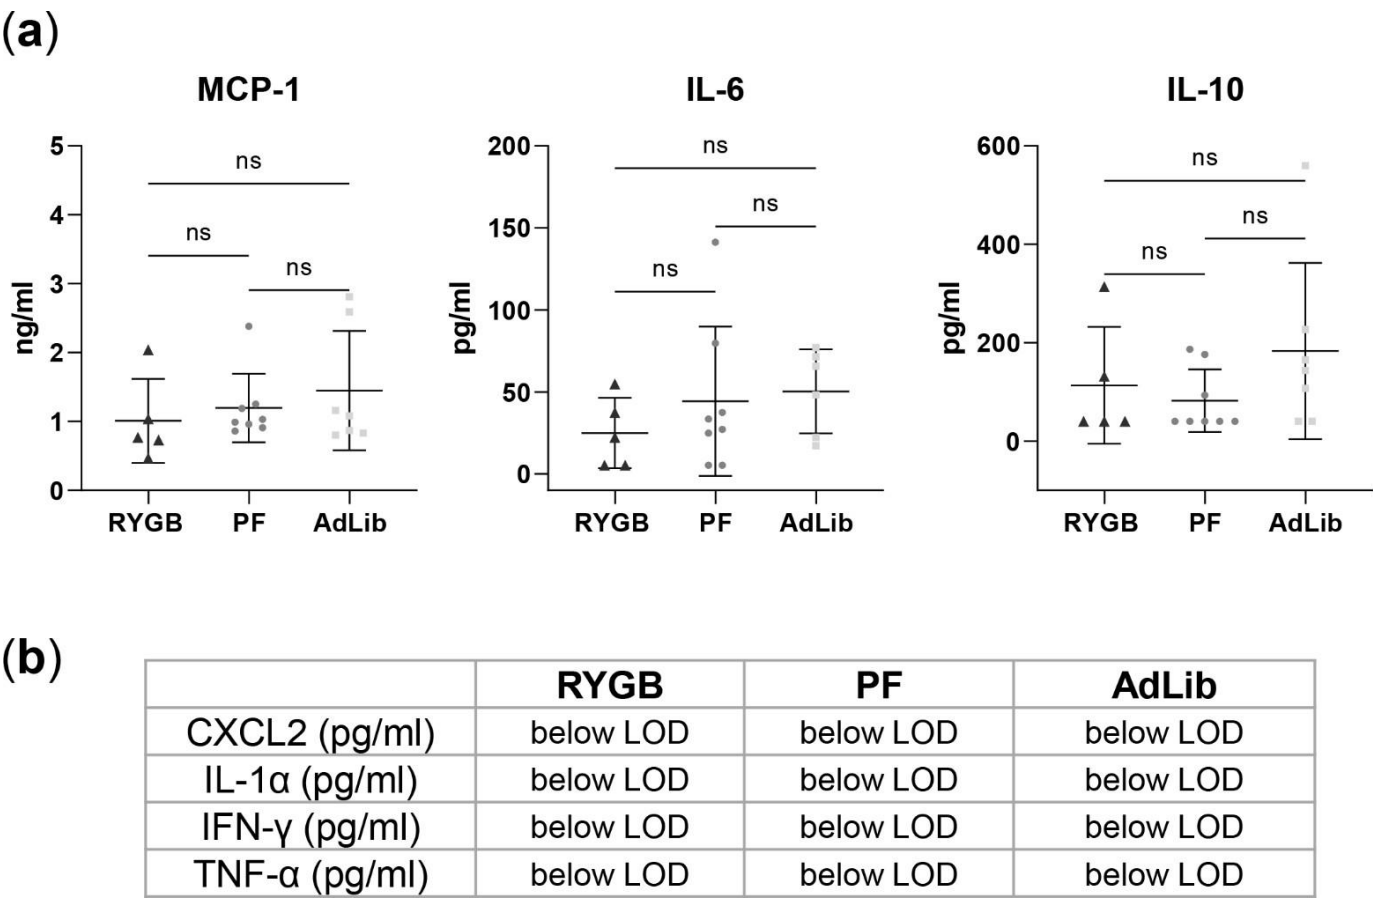

**Supplementary Figure S6: Cytokine profiling of rat plasma.** (a) Quantification of Monocyte Chemoattractant Protein-1 (MCP-1), Interleukin 6 (IL-6) and Interleukin 10 (IL-10), did not pass ordinary one-way ANOVA statistical significance threshold; (b) Chemokine ligand 2 (CXCL2), interleukin 1α (IL-1α), Interferon gamma (IFN-γ) and Tumour Necrosis Factor (TNF) were below the limit of detection (LOD). RYGB (n = 5) black triangles, PF (n = 8) dark grey dots, AdLib (n = 7) light grey squares.

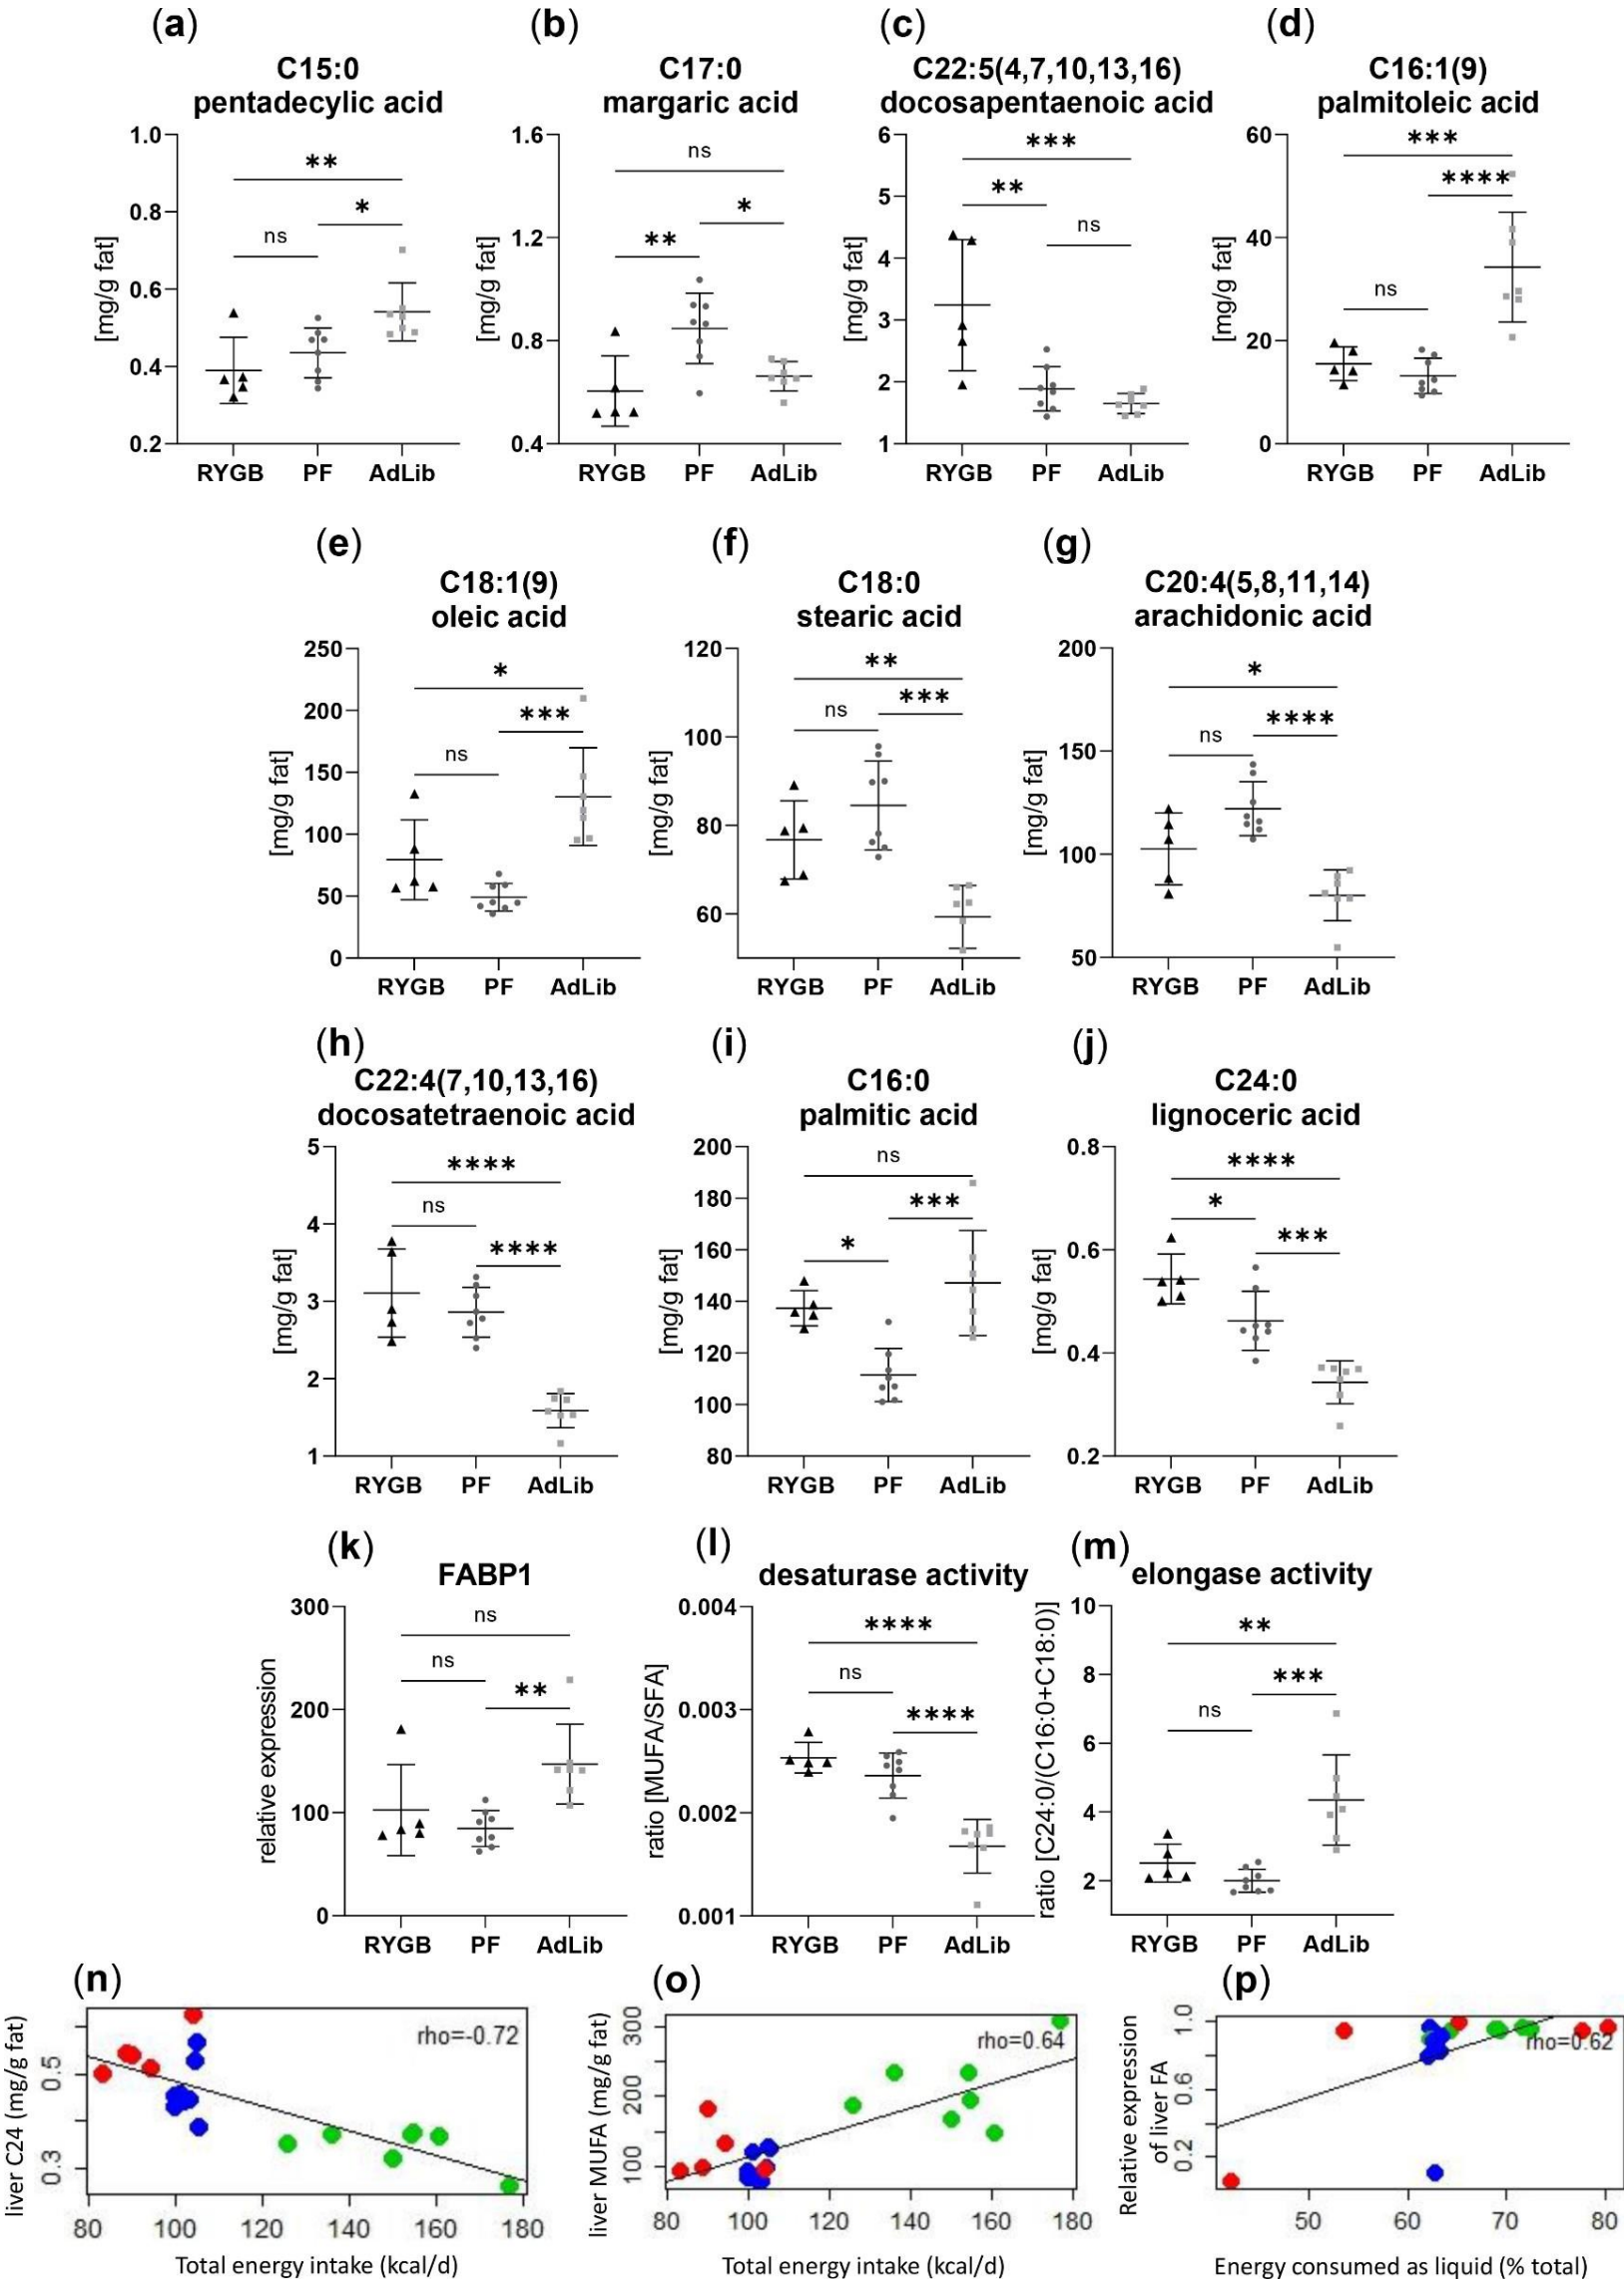

**Supplementary Figure S7: Hepatic lipid analysis.** Mass concentrations (mg/g fat) of hepatic lipid species upregulated in AdLib C14:0 (**a**), C15:0 (**b**), C16:1(9) (**c**), C18:1(9) (**d**); downregulated in AdLib C18:0 (**e**); C20:4(5,8,11,14) (**f**), C22:4(7,10,13,16) (**g**); downregulated in RYGB C18:1(11) (**h**); upregulated in RYGB C22:5(4,7,10,13,16) (**i**), C24:1(15) (**j**); downregulated in AdLib and slightly downregulated in PF C24:0 (**k**); upregulated in PF C17:0 (**l**); downregulated in RYGB C18:1(11) (**m**) compared to the other two groups. One-way ANOVA statistical significance test, RYGB (n = 5) black triangles, PF (n = 8) dark grey dots, AdLib (n = 7) light grey squares, *p*-values: \*\*\*\* < 0.0001, \*\*\* < 0.001, \*\* < 0.01, \* < 0.05. (**n**) Correlations between the total energy intake (kcal/d) versus liver C24:0 (mg/g fat) ( $p=5.10^{-4}$ ;  $\rho = -0.72$ ) and (**o**) liver MUFA (mg/g fat) ( $p=0.0029$ ;  $\rho = 0.64$ ); (**p**) correlation between the energy consumed as liquid (% total) versus relative expression of liver FAS ( $p=0.0038$ ;  $\rho = 0.62$ ). RYGB - red, PF - blue, AdLib - green.

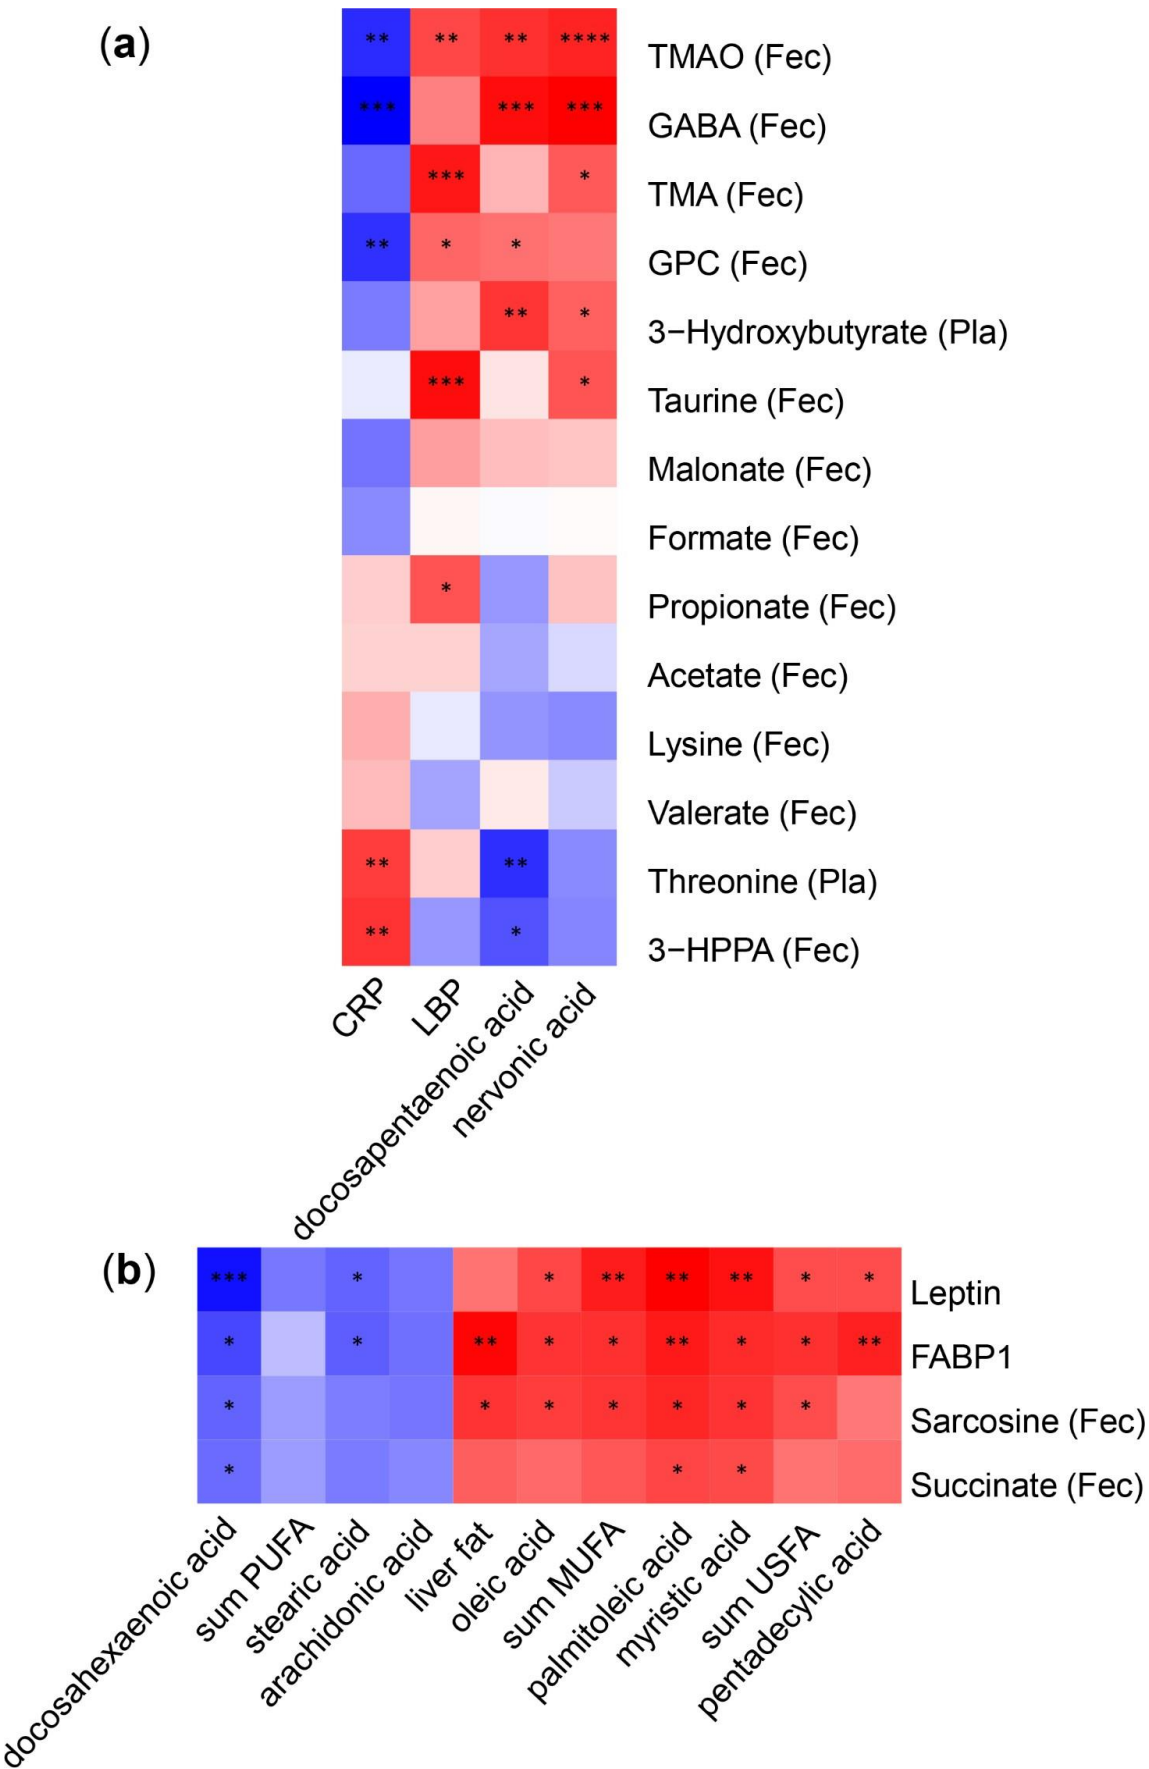

**Supplementary Figure S8: Correlation maps of metabolites, immune, hormonal and liver parameters.** (a) Sham vs. RYGB comparison significantly differing parameters, C22:5(4,7,10,13,16) (docosapentaenoic acid (osbond acid), PUFA, omega-6), C24:1(15) (nervonic acid, MUFA), (b) parameters similar between PF and RYGB (reduced food intake) compared to AdLib, C22:4(7,10,13,16) (docosatetraenoic acid, PUFA, omega-6), C16:1(9) (palmitoleic acid, MUFA), C14:0 (myristic acid, SFA), C15:0 (pentadecylic acid, SFA), C16:1(9) (palmitoleic acid, MUFA), *p*-values: \*\*\*\* < 0.0001, \*\*\* < 0.001, \*\* < 0.01, \* < 0.05.

## Supplementary Tables

| Bregma -1.80      |        | RYGB       | PF          | AdLib       | p-value |
|-------------------|--------|------------|-------------|-------------|---------|
| PVH               | Middle | 3.00±1.66  | 8.43± 4.55  | 5.50±2.88   | 0.44    |
| CeC               | Right  | 7.33±2.63  | 2.80±1.01   | 3.40±1.68   | 0.16    |
|                   | Left   | 10.87±4.60 | 4.27±1.10   | 5.47±3.81   | 0.32    |
| DeN               | Right  | 2.07±1.18  | 0.93±0.43   | 2.53±1.28   | 0.48    |
|                   | Left   | 1.20±0.45  | 0.83±0.40   | 6.07±2.34   | 0.02*   |
| BLA               | Right  | 1.27±1.32  | 1.67±1.26   | 3.60 ± 1.82 | 0.44    |
|                   | Left   | 0.87±0.60  | 4.40±3.68   | 2.87 ±2.45  | 0.57    |
| layer 2 of cortex | Right  | 2.00±1.97  | 14.87±11.63 | 7.30±3.74   | 0.39    |
|                   | Left   | 2.33±2.25  | 11.93±9.01  | 9.73±6.02   | 0.48    |

**Supplementary Table ST1: Average number of c-Fos labelled cells in different brain areas after eight weeks of high sucrose diet in rats** Average numbers were analyzed by counting cells on 3 distinct slices (60 µm thick) for every region. Data were analyzed by ANOVA test followed by a Tukey's post hoc test ( $p < 0.05$ ). Data are means ± SEM (n = 5). PVH – paraventricular hypothalamic nucleus; CeC – central amygdala; DeN – dorsal endopiriform nucleus; BLA – basolateral amygdaloid nucleus, anterior.

| Bregma -1.80      |        | RYGB         | PF           | AdLib        | p-value |
|-------------------|--------|--------------|--------------|--------------|---------|
| PVH               | Middle | 33.73±13.61  | 55.27± 22.14 | 35.07±10.10  | 0.51    |
| CeC               | Right  | 41.20±9.36   | 33.53±13.12  | 41.87±14.44  | 0.84    |
|                   | Left   | 39.60±7.69   | 51.20±14.34  | 43.53±21.57  | 0.84    |
| DeN               | Right  | 123.40±23.86 | 124.53±24.11 | 91.93±19.55  | 0.26    |
|                   | Left   | 122.87±25.44 | 159.30±7.05  | 132.67±32.02 | 0.48    |
| BLA               | Right  | 161.80±21.55 | 172.33±52.96 | 148.47±37.41 | 0.89    |
|                   | Left   | 184.27±14.95 | 179.93±41.91 | 182.80±32.78 | 0.99    |
| layer 2 of cortex | Right  | 338.67±27.05 | 314.77±38.82 | 339.20±37.31 | 0.82    |
|                   | Left   | 318.53±17.72 | 372.63±30.71 | 263.13±59.22 | 0.14    |

**Supplementary Table ST2: Average number of NeuN labeled cells in different brain areas after eight weeks of high sucrose diet in rats.** Average numbers were analyzed by counting cells on 3 distinct slices (60 µm thick) for every region. Data were analyzed by ANOVA test followed by a Tukey's post hoc test if significant (\* $P < 0.05$ ; n.s., non-significant). Data are means ± SEM (n = 5). PVH – paraventricular hypothalamic nucleus; CeC – central amygdala; DeN – dorsal endopiriform nucleus; BLA – basolateral amygdaloid nucleus, anterior.

| Bregma -1.80      |        | Pair-fed    | Ad-libitum | RYGB      | p-value |
|-------------------|--------|-------------|------------|-----------|---------|
| PVH               | Middle | 4.47±2.74   | 2.93±1.78  | 2.10±1.25 | 0.65    |
| CeC               | Right  | 0.87±0.62   | 2.13±1.07  | 2.93±0.88 | 0.21    |
|                   | Left   | 1.67±0.54   | 2.80±1.92  | 4.73±2.48 | 0.43    |
| DeN               | Right  | 0.93±0.43   | 1.13±0.83  | 0.73±0.38 | 0.86    |
|                   | Left   | 0.60±0.36   | 3.87±2.05  | 0.40±0.30 | 0.08    |
| BLA               | Right  | 1.60 ±1.24  | 2.80±1.97  | 0.08±0.08 | 0.31    |
|                   | Left   | 3.87±3.12   | 2.73±2.31  | 0.40±0.45 | 0.49    |
| layer 2 of cortex | Right  | 14.60±11.57 | 4.33±3.48  | 2.00±1.97 | 0.36    |
|                   | Left   | 11.60±8.73  | 7.13±6.38  | 2.27±2.27 | 0.53    |

**Supplementary Table ST3: Average number of co-localized cells (labeled by both c-Fos and NeuN) in different brain areas after eight weeks of high sucrose diet in rats.** Average numbers were analyzed by counting cells on 3 distinct slices (60 µm thick) for every region. Data were analyzed by ANOVA test followed by a Tukey's post hoc test. Data are means ± SEM (n = 5). PVH – paraventricular hypothalamic nucleus; CeC – central amygdala; DeN – dorsal endopiriform nucleus; BLA – basolateral amygdaloid nucleus, anterior.
